# Supplementary material
Source: Research Square preprint supplement (doi:10.21203/rs.3.rs-8662614/v1)
Supplement: Supplementary file 1 [file a34d22b217ad45c7459ac14c.docx]

**(Appendix A.)**

1. **A questionnaire to measure the level of awareness of oral and dental health among parents**

**How did the survey reach you?**

- Parents in schools
- Pediatrician's Clinic
- Other

**When did you complete the current survey?**

- Before watching the dental care awareness video
- After watching the awareness video on dental care "once"
- After watching the dental care awareness video "twice"
- more than twice

**Father's Education**

- nothing
- Secondary
- Higher
- Postgraduate

**Mother's Education**

- nothing
- Secondary
- Higher
- Postgraduate

**Number of children**

- One child
- 2-3 children
- 4-6 children
- More than 6 children

**Age of youngest child**

- From 6 to 12 months
- From 1 to 2 years
- From 2 to 6 years
- Over 6 years old

**Age of oldest child**

- From 6 to 12 months
- From 1 to 2 years
- From 2 to 6 years
- Over 6 years old

**Child’s Gender (6–12 months)**

- Male
- Female
- Male and Female

**Child’s Gender (1–2 years)**

- Male
- Female
- Male and Female

**Child’s Gender (2–6 years)**

- Male
- Female
- Male and Female

**Child’s Gender (More than 6 years)**

- Male
- Female
- Male and Female

**Frequency of consuming foods and drinks containing sugar**

- Nothing
- Once or twice a week
- Several times weekly
- once a day
- More than once daily

**Snacks your child consumes between meals: (Choose all that apply)**

- Fruits
- Vegetables
- Nuts
- Sticky sweets (caramel and toffee)
- Non-sticky sweets (chocolate)
- Chips, crisps, and similar snacks
- Other (please specify)

**Does your child consume milk or other sugary drinks before going to sleep?**

- Yes
- No

**How do you usually feed your child under two years old?**

- Breastfeeding
- Formula feeding
- Using cups
- Combination of the above methods

**Please indicate which of the following are included in your child’s meal? (Select all that apply)**

- Dairy products
- Meat
- Grains such as wheat
- Fruits

**How often does your child consume essential food items (dairy products, vegetables, fruits, meat)?**

- Not specified
- Once a week
- Twice a week
- Once a day
- More than once a day

**How often should your child use a toothbrush and toothpaste to clean their teeth and gums?**

- After every meal
- Twice daily
- Once daily
- Does not brush teeth

**How do you clean your child’s mouth and gums before their teeth appear?**

- Soft toothbrush
- Child’s toothbrush
- Cloth
- Does not use anything

**When should you start using a toothbrush to clean your child’s teeth?**

- Before the eruption of the first primary tooth
- After the eruption of the first primary tooth
- After the eruption of all permanent teeth

**Should a specific type of toothpaste be used for children under two years old?**

- Yes, toothpaste containing fluoride
- Yes, toothpaste without fluoride
- Toothpaste should not be used

**Should a specific type of toothpaste be used for children over two years old?**

- Yes, toothpaste containing fluoride
- Yes, toothpaste without fluoride
- Toothpaste should not be used

**When should a child visit a pediatric dentist?**

- A child should not visit a pediatric dentist
- Only in case of emergency
- Once a year
- Twice a year
- More than twice a year

**Should a child (up to 7 years old) be assisted in brushing their teeth?**

- Yes, they should always be assisted
- Yes, they should sometimes be assisted
- The child brushes their teeth independently
- Teeth should not be brushed

**What is the recommended duration for brushing teeth each time?**

- Less than one minute
- 1–2 minutes
- More than two minutes
- I don’t know

**Should dental floss be used for children?**

- Yes, I help them with it
- Yes, the child uses dental floss independently
- It should not be used

**Have you noticed any of the following in your child’s mouth? (Select all that apply)**

- White or brown spots on the teeth
- Bleeding gums
- Bad breath
- Tooth pain or sensitivity

**Have you faced any of the following difficulties when trying to brush your child’s teeth?**

- The child does not like using a toothbrush
- The child is too young or uncooperative
- The child feels pain when brushing teeth
- There is no time
- forget to brush the teeth

**Which is the first permanent tooth to appear in a child’s mouth?**

- The first tooth in the upper jaw
- The first tooth in the lower jaw
- The lower canine
- The sixth molar behind the primary molars

**Do you monitor white spots if they appear on the front teeth?**

- Yes, I monitor and also check the sixth molar
- Yes, I monitor only the front teeth
- No, I do not pay attention to white spots on teeth or molars
- I only pay attention to black spots on the molars

**Do you think there is a relation between the appearance of white spots on the front teeth and decay of the sixth molar?**

- Yes, there is a relation and both should be monitored
- Yes, there is a relation but only one tooth is checked
- There is no relation between them

**Is it recommended to rinse the mouth with water after sugary meals?**

- Always
- Sometimes
- Not recommended

**What is the preferred method of using a toothbrush?**

- Circular method
- Horizontal method
- Slanted method on the teeth
- There is no single preferred method

**Do you think there are harmful effects of foods that contain high amounts of sugar on your child’s dental health?**

- Yes
- No

**Have you ever received medical advice regarding your child’s oral health?**

- Yes, from a dentist
- Yes, from a pediatrician
- Yes, from social media
- No

**Are you interested in awareness programs about your child’s oral health?**

- Yes
- No

**Do you perform regular home checks for any signs of tooth decay or gum inflammation?**

- Yes
- No

**If your child uses formula feeding, does he/she go to sleep with a bottle of milk?**

- Yes
- No
- My child does not use formula feeding

**How old was your child when he/she switched from bottle feeding to cups?**

- Less than 12 months
- 12–15 months
- 15–18 months
- Older than 18 months

**Which teeth are most susceptible to early childhood caries?**

- Upper posterior teeth
- Lower posterior teeth
- Upper anterior teeth
- Lower anterior teeth

**Do you have any questions or inquiries regarding your child’s diet and oral health care?**

…………………………..

1. **Children's Oral Health Questionnaire**

**What do you think is the cause of tooth decay?**

- Not brushing teeth causes tooth decay. ( 😀 Very happy / Very satisfied – 🙂 Happy / Satisfied – 😐 Neutral – 🙁 Unhappy / Dissatisfied – 😡 Very unhappy / Very dissatisfied )
- Snacking between meals leads to dental caries. ( 😀 Very happy / Very satisfied – 🙂 Happy / Satisfied – 😐 Neutral – 🙁 Unhappy / Dissatisfied – 😡 Very unhappy / Very dissatisfied )
- Eating sticky foods such as toffee and crisps contributes to tooth decay. ( 😀 Very happy / Very satisfied – 🙂 Happy / Satisfied – 😐 Neutral – 🙁 Unhappy / Dissatisfied – 😡 Very unhappy / Very dissatisfied )
- Irregular dental check-ups contribute to tooth decay. ( 😀 Very happy / Very satisfied – 🙂 Happy / Satisfied – 😐 Neutral – 🙁 Unhappy / Dissatisfied – 😡 Very unhappy / Very dissatisfied )

**According to you, how many times per day should teeth be brushed to prevent dental caries?**

- 1
- 2
- 3
- Don’t know

**I normally clean my teeth after waking up.**

- 😀 **Very happy / Very satisfied**
- 🙂 **Happy / Satisfied**
- 😐 **Neutral**
- 🙁 **Unhappy / Dissatisfied**
- 😡 **Very unhappy / Very dissatisfied**

**I usually brush my teeth between meals.**

- 😀 **Very happy / Very satisfied**
- 🙂 **Happy / Satisfied**
- 😐 **Neutral**
- 🙁 **Unhappy / Dissatisfied**
- 😡 **Very unhappy / Very dissatisfied**

**I typically brush my teeth at night before sleeping.**

- 😀 **Very happy / Very satisfied**
- 🙂 **Happy / Satisfied**
- 😐 **Neutral**
- 🙁 **Unhappy / Dissatisfied**
- 😡 **Very unhappy / Very dissatisfied**

**What tools do you use to clean your teeth?**

- Toothpaste
- Toothbrush
- Mouthwash
- Dental floss

**Do you use toothpaste that contains fluoride?**

- Yes
- No
- I don’t know

**How often do you consume sweets or sugary drinks?**

- Daily
- Several times a week
- Between meals every day
- Rarely

**How often do you eat fruits or vegetables daily?**
(Scale from 1 to 5, where 1 = Never and 5 = Always)

**Have you ever visited a dentist before?**

- Yes
- No

**If you have visited a dentist, what was the reason?**

- Routine check-up
- Treatment of dental caries
- Pain

**To what extent do you feel afraid of visiting the dentist?**

- 😀 **Very happy / Very satisfied**
- 🙂 **Happy / Satisfied**
- 😐 **Neutral**
- 🙁 **Unhappy / Dissatisfied**
- 😡 **Very unhappy / Very dissatisfied**

**How did you receive this questionnaire?**

- Parents at school
- Pediatric clinic
- Other
- Add option (please specify)

**When did you complete the current questionnaire?**

- Before watching the dental care awareness video
- After watching the dental care awareness video once
- After watching the dental care awareness video twice
- After watching the dental care awareness video more than twice
- **Other (please specify):**
